# Supplementary material for: Genome Microscale Heterogeneity among Wild Potatoes Revealed by Diversity Arrays Technology Marker Sequences
Source: Hindawi journal article supplement (doi:10.1155/2013/257218), 2013-01-01
Supplement: f1 [file 257218.f1.xls]

## Sheet: Table S1
			Potato							Tomato
			DArT ID	chr#	No. ungapped	ungapped length	gapped length	genome region	annotation	chr#	No. ungapped	ungapped length	gapped length	genome region	annotation
	BLB		459069	4	2	623-179	94	14273829 - 14274724	N-acetylglucosaminyl transferase component Gpi1 InterPro: IPR007720 N-acetylglucosaminyl transferase component	4	2	615-179	94	7769795 - 7770682	N-acetylglucosaminyl transferase component Gpi1 InterPro: IPR007720 N-acetylglucosaminyl transferase component
			536049	6	2	187-104	584	58250168 - 58251042	Photosystem I reaction center subunit XI InterPro: IPR003757 Photosystem I reaction centre, subunit XI PsaL	6	2	189-26	549	44853164 - 44853927	Photosystem I reaction center subunit XI InterPro: IPR003757 Photosystem I reaction centre, subunit XI PsaL
			535693	8	2	73-510	664	40665142 - 40666388	Sec1-4 syntaxin-binding protein InterPro: IPR001619 Sec1-like protein	8	2	509-73	661	60195389 - 60196631	Sec1-4 syntaxin-binding protein InterPro: IPR001619 Sec1-like protein
			459025	1	2	163-215	83	82161502 - 82161962	Splicing factor 3a subunit 3	1	3	193-57-123	75-5161	78736939 - 78742547	Splicing factor 3a subunit 3 / F-box/LRR-repeat protein InterPro: IPR006553 Leucine-rich repeat, cysteine-containing subtype
			535681	1	3	175-40-526	155-163	85755205 - 85756263	Chaperone protein dnaJ InterPro: IPR001623 Heat shock protein DnaJ, N-terminal	1	2	149-434	367	81302877 - 81303826	Chaperone protein dnaJ InterPro: IPR001623 Heat shock protein DnaJ, N-terminal
			538320	3	2	245-249	213	1890580 - 1891286	Aladin (Fragment) InterPro: IPR017986 WD40 repeat, region	8	2	321-174	59	25829856 - 25830409	Cytochrome cd1-nitrite reductase-like C-terminal haem d1 InterPro: IPR011046 WD40 repeat-like
			537587	8	2	503-6	222	2829588 - 2830318	UDP-glucosyltransferase family 1 protein InterPro: IPR002213 UDP-glucuronosyl/UDP-glucosyltransferase	8	2	497-12	152	1023959 - 1024619	Myosin-like protein (Fragment)
	CMM		459313	1	2	288-293	108	75251491 - 75252180	Siroheme synthase InterPro: IPR006366 Uroporphyrin-III C-methyltransferase, C-terminal	1	2	290-281	112	73385337 - 73386020	Siroheme synthase InterPro: IPR006366 Uroporphyrin-III C-methyltransferase, C-terminal
			534108	1	2	288-294	108	75251491 - 75252180		1	2	291-248	112	73385337 - 73386020
			459200	11	2	474-372	296	44296759 - 44297900	Arsenite-transporting ATPase InterPro: IPR003348 ATPase, anion-transporting	11	2	378-477	296	51547597 - 51548747	Arsenite ATPase transporter (Eurofung) InterPro: IPR003348 ATPase, anion-transporting
			473458	11	2	474-372	296	44296759 - 44297900		11	2	378-477	296	51547597 - 51548747
			539808	11	2	330-180	38	47381848 - 47382395	Ras-related protein Rab-8A InterPro: IPR003579 Ras small GTPase, Rab type	11	2	330-179	38	53249978 - 53250524	Ras-related protein Rab-8A InterPro: IPR003579 Ras small GTPase, Rab type
			534100	2	2	380-171	50	50920759 - 50921359	Amino acid transporter InterPro: IPR015606 Cationic amino acid transporter	2	2	366-78	55	34635711 - 34636209	Amino acid transporter InterPro: IPR015606 Cationic amino acid transporter
			538106	4	3	99-87-289	1291-99	56103012 - 56104876	Seryl-tRNA synthetase InterPro: IPR018156 Seryl-tRNA synthetase, class IIa, C-terminal	4	3	96-87-284	276-93	58160696 - 58161531	Seryl-tRNA synthetase InterPro: IPR018156 Seryl-tRNA synthetase, class IIa, C-terminal
			539446	6	2	246-183	236	7844378 - 7845042	Triosephosphate isomerase InterPro: IPR000652 Triosephosphate isomerase	6	3	181-6-166	60-176	508008 - 508596	Triosephosphate isomerase InterPro: IPR000652 Triosephosphate isomerase
			457852	10	2	133-174	711	21479960 - 21480977	MAGE (Fragment) InterPro: IPR002190 MAGE protein	10	3	133-8-166	249-85	10763739 - 10764379	Melanoma-associated antigen G1 InterPro: IPR002190 MAGE protein
			471579	3	2	319-126	56	19074492 - 19074992	Ankyrin repeat-rich protein InterPro: IPR002110 Ankyrin	3	2	338-107	119	7838916 - 7839479	Ankyrin repeat-rich protein InterPro: IPR002110 Ankyrin
			533618	1	2	336-153	87	90165199 - 90165774		1	2	338-154	74	84846615 - 84847180
			538934	2	2	265-280	50	58794457 - 58795051		2	2	237-256	50	40074876 - 40075418
			536061	3	3	301-7-370	626-387	43832012 - 43833703		3	2	145-539	7892	60582769 - 60591344	WD-40 repeat protein-like (Fragment) InterPro: IPR017986 WD40 repeat, region
			536551	3	3	302-7-365	626-387	43832012 - 43833703		3	2	96-592	407	60590250 - 60591344
			540141	3	2	279-290	1003	43832013 - 43833584		3	2	117-449	7890	60582769 - 60591344
			459240	3	2	283-405	1003	43832013 - 43833703		3	2	117-569	7890	60582769 - 60591344
	BLB /CMM		473806	6	2	519-93	549	53569859 - 53571019	AP-2 complex subunit alpha InterPro: IPR017104 Adaptor protein complex AP-2, alpha subunit	6	2	13-507	146	42585672 - 42586337	AP-2 complex subunit alpha InterPro: IPR017104 Adaptor protein complex AP-2, alpha subunit

## Sheet: Table S2
		DArT ID	Contigs	species	Potato		Tomato		nr	protein
					chromosome(s)	annotation	chromosome(s)	annotation
	1	539461		BLB	-	-	-	-	-	hypothetical protein BAXH7_01640 [Bacillus amyloliquefaciens XH7]
	2	538401		CMM	-	-	-	-	-	-
	3	533653		CMM	3	-	3	-	-	-
	4	473687		BLB/CMM	3	-	3	-	-	-
	5	537581		BLB	10	-	10	-	-	-
	6	535634		CMM	6	-	6	-	-	CBN-GAD-2 protein [Caenorhabditis brenneri]
	7	534273		CMM	11	-	11	-	-	GPI-anchored surface glycoprotein [Schistosoma mansoni]
	8	536386		BLB	3	-	3	-	Solanum demissum chromosome 5 clone PGEC475B22, complete sequence	-
	9	473719		BLB	6	-	6	Genomic DNA chromosome 5 P1 clone MHM17	-	-
	10	552071	Contig6	CMM	7	Cyclin-dependent kinase CDC2C	7	-	-	Strong similarity to the putative protein kinase F26A9.10 gi|6682614 from A. thaliana on BAC gb|AC016163 ; It contains an eukaryotic protein kinase domain PF|00069. This gene is cut off [Arabidopsis thaliana]
	11	538036		CMM
	12	539948		BLB	5	Cleft lip and palate associated transmembrane protein-like InterPro: IPR008429 Cleft lip and palate transmembrane 1	5	Cleft lip and palate associated transmembrane protein-like InterPro: IPR008429 Cleft lip and palate transmembrane 1	Solanum tuberosum L362 gene, complete sequence	-
	13	472847		BLB	1	DNA polymerase III gamma and tau subunit InterPro: IPR012763 DNA polymerase III, subunit gamma/ tau	1	DNA polymerase III gamma and tau subunit InterPro: IPR012763 DNA polymerase III	Solanum lycopersicum strain Heinz 1706 chromosome 1 clone hba-43d23 map 1, complete sequence	replication factor C / DNA polymerase III gamma-tau subunit, putative [Ricinus communis]
	14	472507		BLB/CMM	10	Os07g0507200 protein (Fragment) InterPro: IPR009675 Targeting for Xklp2	10	Os07g0507200 protein (Fragment) InterPro: IPR009675 Targeting for Xklp2	-	-
	15	537586		BLB	8	Senescence-associated protein InterPro: IPR000301 Tetraspanin, subgroup	8	Senescence-associated protein InterPro: IPR000301 Tetraspanin	Solanum lycopersicum DNA, chromosome 8, clone: C08SLe0023D06, complete sequence	hypothetical protein BATDEDRAFT_85575 [Batrachochytrium dendrobatidis JAM81]
	16	473780		BLB	2	Succinate dehydrogenase iron-sulfur protein InterPro: IPR004489 Succinate dehydrogenase/fumarate reductase iron-sulphur	2	Iron sulfur subunit of succinate dehydrogenase InterPro: IPR004489 Succinate dehydrogenase/fumarate reductase iron-sulphur protein	Solanum lycopersicum chromosome 2 clone C02SLe0053H21, complete sequence	mitochondrial succinate dehydrogenase iron sulfur subunit [Solanum lycopersicum] gb|ACZ71182.1| mitochondrial succinate dehydrogenase iron sulfur subunit [Solanum lycopersicum]
	17	538546		BLB	2	Superoxide dismutase InterPro: IPR001189 Manganese/iron superoxide dismutase	2	Superoxide dismutase InterPro: IPR001189 Manganese/iron superoxide dismutase	Solanum chacoense chloroplast iron superoxide dismutase 3 (FSD3) mRNA, complete cds; nuclear gene for chloroplast product	chloroplast iron superoxide dismutase 3 [Solanum chacoense]
	18	473467		CMM	1	SWI4 1 Peter Pan-like protein suppressor InterPro: IPR007109 Brix domain	1	SWI4 1 Peter Pan-like protein suppressor InterPro: IPR007109 Brix domain	-	-
	19	540064		BLB	11	U6 snRNA-associated Sm-like protein LSm3 InterPro: IPR006649 Like-Sm ribonucleoprotein, eukaryotic and archaea-type, core	11	Small nuclear ribonucleoprotein LsM3 InterPro: IPR006649 Like-Sm ribonucleoprotein	-	-
	20	535916		BLB	4	Zinc transporter InterPro: IPR003689 Zinc/iron permease	4	Zinc transporter InterPro: IPR003689 Zinc/iron permease	-	cofilin 2, muscle (predicted), isoform CRA_a [Rattus norvegicus]
	21	537383	Contig5	BLB	1	60S ribosomal protein L36 InterPro: IPR000509 Ribosomal protein L36e	1-11	60S ribosomal protein L36 InterPro: IPR000509 Ribosomal protein L36e	-	60S ribosomal protein L36e, putative [Ricinus communis] (60S ribosomal protein L36e, putative)
	22	537699		BLB
	23	535337		BLB	1-2	mRNA clone RTFL01-46-O16 / Transmembrane protein 34 InterPro: IPR005178 Protein of unknown function DUF300	1-2	MAPK activating protein InterPro: IPR005178 Protein of unknown function DUF300 Transmembrane protein 34 InterPro: IPR005178 Protein of unknown function DUF300	-	unnamed protein product [Vitis vinifera]
	24	552258		BLB	4-7	-	4-7	-	-	-
	25	537103		BLB/CMM	4-5	-	-	-	-	cobalamin biosynthesis precorrin-2 methyltransferase [Roseovarius sp. 217]
	26	534573		BLB	9-11	Aspartokinase / Homoserine dehydrogenase InterPro: IPR001342 Homoserine dehydrogenase, catalytic -Cc-nbs-lrr resistance InterPro: IPR004000 Actin/actin-like	11	Aspartokinase/homoserine dehydrogenase InterPro: IPR001342 Homoserine dehydrogenase	Solanum demissum chromosome 11 clone PGEC591C22, complete sequence	-
	27	534745	Contig3	BLB	4-6-8	-	6-8	-	-	hypothetical protein BDDG_06425 [Ajellomyces dermatitidis ATCC 18188]
	28	457617		BLB
	29	459445		BLB
	30	535080	Contig4	CMM	1-5-10-12	-	4-5	-	-	variant-specific surface protein VSP MM/Sac-C/1 [Giardia intestinalis]
	31	537254		CMM
	32	536210		CMM
	33	535146		CMM	1-2-3-4-5-6-7-8-9-10-11-12	-	1-2-3-4-5-6-7-8-9-10-11-12	-	-	Polyprotein, putative [Solanum demissum]
	34	534163	Contig7	CMM	1-2-3-4-5-6-7-8-9-10-11-12	-	1-2-3-4-5-6-7-8-9-10-11-12	-	-	Polyprotein, putative [Solanum demissum]
	35	533646		CMM
	36	539220		BLB	1-2-3-4-5-6-7-8-9-10-11-12	-	1-2-3-4-5-7-8-9-10-11-12	-	-	retroelement pol polyprotein-like [Arabidopsis thaliana]
	37	536670		CMM	1-3-4-5-6-8-9-11	Polyadenylate-binding protein 1 InterPro: IPR012677 Nucleotide-binding, alpha-beta plait Uncharacterized RNA-binding protein C23E6.01c InterPro: IPR012677 Nucleotide-binding, alpha-beta plait	2-3-4-5-7-9-10-11-12	RNA-binding protein InterPro: IPR012677 Nucleotide-binding Histone H3 methyltransferase complex and RNA cleavage factor II complex subunit SWD2 InterPro: IPR020472 G-protein beta WD-40 repeat	Solanum lycopersicum chromosome 3 clone C03HBa0030A11, complete sequence	U2-associated protein SR140 [Medicago truncatula]
	38	536523	Contig2	BLB	1-4-6-7-8-9-11	Rhodopsin-like receptor InterPro: IPR019358 Protein of unknown function DUF2215 Nuclear transcription factor Y subunit B-3 InterPro: IPR003956 Transcription factor, NFYB/HAP3, conserved site Genomic DNA chromosome 5 TAC clone K21L19 ATP-dependent RNA helicase InterPro: IPR011545 DNA/RNA helicase, DEAD/DEAH box type, N-terminal	2-4-6-7-9-12	Genomic DNA chromosome 5 TAC clone K21L19	Solanum lycopersicum DNA sequence from clone LE_HBa-32K7 on chromosome 12, complete sequence	retrotransposon protein, putative, LINE subclass [Oryza sativa Japonica Group]
	39	536765		BLB
	40	471145		BLB
	41	533870		BLB
	42	539082		BLB	1-2-3-4-5-6-7-8-9-10-11-12	MADS-box transcription factor InterPro: IPR002100 Transcription factor, MADS-box Ubiquitin-like modifier-activating enzyme 5 InterPro: IPR009036 Molybdenum cofactor biosynthesis, MoeB ATP-dependent RNA helicase A-like protein InterPro: IPR011545 DNA/RNA helicase, DEAD/DEAH box type, N-terminal Arginyl-tRNA protein transferase 1 InterPro: IPR017137 Arginine-tRNA-protein transferase 1, eukaryotic -…	1-2-3-4-5-6-7-8-9-10-11-12	Squalene monooxygenase InterPro: IPR013698 Squalene epoxidase Phosphatidylinositol-4-phosphate 5-kinase family protein InterPro: IPR017163 Phosphatidylinositol-4-phosphate 5-kinase Cleavage and polyadenylation specificity factor subunit 5 InterPro: IPR016706 Cleavage and polyadenylation specificity factor Ubiquitin thioesterase otubain-like protein InterPro: IPR016615 Ubiquitin thioesterase Otuba…	Solanum quitoense clone 04T142-3 At3g51140-like protein gene, intron	putative permease [Solanum lycopersicum]
	43	534025		BLB/CMM	1-2-3-4-5-6-7-8-9-10-11-12	Transcription initiation factor IIB InterPro: IPR000812 Transcription factor TFIIB related DNA primase/helicase InterPro: IPR006171 Toprim domain G patch domain-containing protein 1-like protein InterPro: IPR011666 Protein of unknown function DUF1604 InterPro: MYB transcription factor (Fragment) InterPro: IPR006447 Myb-like DNA-binding region, SHAQKYF class Arsenite-transporting ATPase InterPro: …	1-2-3-4-5-6-7-8-9-10-11-12	Acetyl-CoA carboxylase biotin carboxylase InterPro: IPR004549 Acetyl-CoA carboxylase-DNA primase/helicase Toprim domain-Ubiquitin carboxyl-terminal hydrolase InterPro: IPR001394 Peptidase C19-Arf-GAP with GTPase DNA topoisomerase InterPro: IPR000380 DNA topoisomerase ATP-dependent Clp protease ATP-binding subunit clpX InterPro: IPR004487 ClpX Genomic DNA chromosome 5 TAC clone K21L19 Peptidyl pro…	Solanum demissum chromosome 11 clone PGEC417F14, complete sequence	unnamed protein product [Vitis vinifera]
	44	473041		BLB	1-2-3-4-5-6-7-8-9-10-11-12	Metal ion binding protein ATP-dependent zinc metalloprotease FtsH InterPro: IPR003959 ATPase, AAA-type, core KH domain containing protein expressed InterPro: IPR018111 K Homology, type 1, subgroup Serine/threonine kinase InterPro: IPR002290 Serine/threonine protein kinase Cyst nematode resistance protein-like protein Thioredoxin h-like protein InterPro: IPR015467 Thioredoxin, core Ethanolamine-ph…	1-3-4-7-9-10-11	Phosphatidylinositol kinase InterPro: IPR015433 Phosphatidylinositol Kinase	S.lycopersicum DNA sequence from clone SL_MboI-39E17 on chromosome 4, complete sequence	disease resistance protein [Brassica rapa subsp. pekinensis]
	45	473042		BLB	1-2-3-4-5-6-7-8-9-10-11-13	Metal ion binding protein ATP-dependent zinc metalloprotease FtsH InterPro: IPR003959 ATPase, AAA-type, core KH domain containing protein expressed InterPro: IPR018111 K Homology, type 1, subgroup Serine/threonine kinase InterPro: IPR002290 Serine/threonine protein kinase Cyst nematode resistance protein-like protein Thioredoxin h-like protein InterPro: IPR015467 Thioredoxin, core Ethanolamine-ph…	1-3-4-7-9-10-12	Phosphatidylinositol kinase InterPro: IPR015433 Phosphatidylinositol Kinase	S.lycopersicum DNA sequence from clone SL_MboI-39E17 on chromosome 4, complete sequence	disease resistance protein [Brassica rapa subsp. pekinensis]
	46	535400		CMM	1-2-3-4-5-8-9-11	WD-40 repeat protein-like InterPro: IPR017986 WD40 repeat, region	1-3-5-11-12	WD-40 repeat protein-like InterPro: IPR020472 G-protein beta WD-40 repeat Inner membrane ALBINO3-like protein InterPro: IPR011990 Tetratricopeptide-like helical	-	-
	47	534197	Contig1	BLB	1-2-3-4-6-8-10-11-12	mRNA clone RTFL01-46-O16 InterPro: IPR005178 Protein of unknown function DUF300 Transmembrane protein 34 InterPro: IPR005178 Protein of unknown function DUF300 ATP dependent RNA helicase InterPro: IPR011545 DNA/RNA helicase, DEAD/DEAH box type, N-terminal CTV.22 InterPro: IPR003101 Coactivator CBP, KIX Potassium transporter family protein InterPro: IPR003855 K+ potassium transporter MYB transcrip…	1-2-6	MAPK activating protein InterPro: IPR005178 Protein of unknown function DUF300 Transmembrane protein 34 InterPro: IPR005178 Protein of unknown function DUF300 selenoprotein InterPro: IPR014912 Sep15/SelM redox	Solanum lycopersicum cDNA, clone: LEFL2027L10, HTC in fruit	PREDICTED: transmembrane protein 184 homolog DDB_G0284525-like isoform 1 [Brachypodium distachyon]
	48	534408		BLB
	49	535176		BLB
	50	534677		BLB
	51	472936		CMM	1-3-4-5-6-7-8-9-10-11-12	Polyphosphoinositide phosphatase InterPro: IPR001202 WW/Rsp5/WWP	1-2-3-4-5-9-10-11-12	Histone H3 methyltransferase complex and RNA cleavage factor II complex subunit SWD2 InterPro: IPR020472 G-protein beta WD-40 repeat	Solanum lycopersicum strain Heinz 1706 chromosome 10 clone hba-58f18 map 10, complete sequence	hypothetical protein [Beta vulgaris subsp. vulgaris] (func: endonuclease, reverse transcriptase and RNaseH-like region)

## Sheet: Table S3
			common						specific
			ungapped			gapped			ungapped			gapped
			BLB	CMM	BLB/CMM	BLB	CMM	BLB/CMM	BLB	CMM	BLB/CMM	BLB	CMM	BLB/CMM
	Potato	chr01	17.482	18.383	1.418	1.516	0.484	0	2.965	1.751	0.836	2.655	0.055	0
		chr02	14.967	14.729	1.058	1.048	0.27	0	4.965	3.071	0.774	0.05	6.89	0
		chr03	12.515	13.877	2.437	0.213	1.392	0	7.743	2.635	0	3.001	0.2	0
		chr04	12.053	6.629	2.18	4.803	1.39	0	3.536	0.774	0.667	0.293	0	0
		chr05	8.865	3.414	0	0.885	0.033	0	5.721	2.104	0	0.345	0	0
		chr06	13.202	10.09	2.702	1.613	2.229	0	6.02	1.667	0	0.254	0.434	0
		chr07	9.543	4.015	0	0.784	0.979	0	3.841	3.172	0.468	0.084	2.354	0
		chr08	9.488	6.523	1.821	1.168	0	0.504	3.768	1.396	1.08	0	0	0
		chr09	10.111	3.944	1.058	4.608	0	0	3.93	0.92	0.557	0.037	0	0
		chr10	9.233	6.069	1.408	2.713	0.391	0	1.426	1.934	0.523	0	0	0.188
		chr11	11.545	7.418	1.885	0	0.385	0	2.304	1.568	0	3.228	0.427	0
		chr12	4.752	2.636	3.086	0	0	0	1.323	1.287	0.944	0.218	0	0
	Tomato	chr01	17.431	17.84	1.348	5.831	2.659	0	2.454	1.121	0.397	0	0	0.675
		chr02	15.048	14.742	1.078	0.058	0.412	0	1.177	1.235	0.449	0	1.056	0
		chr03	11.19	13.483	2.493	2.602	8.548	0	4.478	3.637	0	0	0	0
		chr04	11.147	6.528	2.141	0.343	0.369	0	4.985	0.859	0.331	0	0	0
		chr05	9.213	3.426	0	0	1.296	0	1.128	0.377	0	2.147	0	0
		chr06	12.718	9.73	2.604	1.386	0.236	0	1.304	3.037	0	0	10.793	0
		chr07	9.11	3.893	0	2.6	0	0	1.433	0	0.373	0	0	0
		chr08	9.787	6.022	1.815	3.929	0.312	0	0.67	0.608	0	0	0.28	0
		chr09	10.186	4.111	1.059	0.442	0.654	0	3.098	0.414	0	1.594	0	0
		chr10	8.779	6.225	0.871	4.155	0.085	0.215	0.52	2.098	0.929	0	0	0
		chr11	10.305	6.957	1.883	0.05	0.334	0	0.519	2.634	0.75	0	0	0
		chr12	4.651	2.32	2.458	0.139	0	0.241	1.266	1.246	0	0	0	0
